# Supplementary material
Source: PubMed Central journal article supplement (PMC7888481)

## Supporting Information

### ***N*-Benzyl-linoleamide, a Constituent of *Lepidium meyenii* (Maca), is an Orally Bioavailable Soluble Epoxide Hydrolase Inhibitor that Alleviates Inflammatory Pain**

Nalin Singh,<sup>†,‡</sup> Bogdan Barnych,<sup>†,‡</sup> Christophe Morisseau,<sup>†</sup> Karen M. Wagner,<sup>†</sup> Debin Wan,<sup>†</sup> Ashley Takeshita,<sup>†</sup> Hoang Pham,<sup>†</sup> Ting Xu,<sup>§</sup> Abhaya Dandekar,<sup>⊥</sup> Jun-Yan Liu,<sup>||</sup> and Bruce D. Hammock<sup>\*,†</sup>

<sup>†</sup>Department of Entomology and Nematology and UC Davis Comprehensive Cancer Center, University of California Davis, Davis, CA, 95616, United States

<sup>§</sup>Beijing Advanced Innovation Center for Food Nutrition and Human Health, College of Resources and Environmental Sciences, China Agricultural University, Beijing, 100193, People's Republic of China

<sup>⊥</sup>Department of Plant Sciences, University of California Davis, Davis, CA, 95616, United States

<sup>||</sup>Institute of Life Sciences, Chongqing Medical University, Chongqing, 400016, People's Republic of China

## Contents

|                                                                                                                                                                                                                                                                                                                                                                                                                                               |                |
|-----------------------------------------------------------------------------------------------------------------------------------------------------------------------------------------------------------------------------------------------------------------------------------------------------------------------------------------------------------------------------------------------------------------------------------------------|----------------|
| <b>Supporting Information .....</b>                                                                                                                                                                                                                                                                                                                                                                                                           | <b>S1</b>      |
| <b><i>N</i>-Benzyl-linoleamide, a Constituent of <i>Lepidium meyenii</i> (Maca), is an Orally Bioavailable Soluble Epoxide Hydrolase Inhibitor that Alleviates Inflammatory Pain.....</b>                                                                                                                                                                                                                                                     | <b>S1</b>      |
| <b>Table S1. Descriptions of thirteen commercial <i>L. meyenii</i> (maca) products.....</b>                                                                                                                                                                                                                                                                                                                                                   | <b>S3</b>      |
| <b>Table S2. HPLC-MS/MS method Limits of Quantitation.....</b>                                                                                                                                                                                                                                                                                                                                                                                | <b>S3-S4</b>   |
| <b>Table S3. Sum of abundance/IC<sub>50</sub> ratios of individual macamides in <i>L. meyenii</i> extracts.....</b>                                                                                                                                                                                                                                                                                                                           | <b>S4</b>      |
| <b>Figure S1. Pharmacokinetic study in rat: 96-hr time course for plasma concentrations of macamides 4 and 5.....</b>                                                                                                                                                                                                                                                                                                                         | <b>S4-S5</b>   |
| <b>Figure S2. Analgesic efficacy of macamide 5 (100 mg/kg) against LPS induced inflammatory pain in rat was not statistically significant compared to the vehicle control. Scores are the mean ± SEM reported as percent of baseline (normalized to 100%) calculated as the score × 100/baseline score (Kruskal-Wallis One Way Analysis of Variance on Ranks, <math>\alpha=0.05</math>, <math>p=0.407</math>, <math>n=4</math>/group) ...</b> | <b>S5</b>      |
| <b>Table S4. Experimental and Literature IC<sub>50</sub> values of positive control, <i>t</i>-TUCB .....</b>                                                                                                                                                                                                                                                                                                                                  | <b>S5</b>      |
| <b>Table S5. Normalized efficiencies of macamide extraction procedures.....</b>                                                                                                                                                                                                                                                                                                                                                               | <b>S5-S6</b>   |
| <b>Figure S3. HPLC Trace of the extract of commercial <i>L. meyenii</i> product 2 and the known natural product macamides detected (2-5, 8-12).....</b>                                                                                                                                                                                                                                                                                       | <b>S6-S9</b>   |
| <b><sup>1</sup>H and <sup>13</sup>C NMR Spectra of new compounds (16, 17 and 19).....</b>                                                                                                                                                                                                                                                                                                                                                     | <b>S10-S15</b> |

**Table S1.** Descriptions of thirteen commercial *L. meyenii* (maca) products

| <i>L. meyenii</i> product | Description                                    |
|---------------------------|------------------------------------------------|
| Product 1                 | Purple maca root slices from Lijiang, China    |
| Product 2                 | Yellow maca root from Lijiang, China           |
| Product 3                 | Black maca root from Shaotong City, China      |
| Product 4                 | Black maca root from Lijiang, China            |
| Product 5                 | Black maca root from Peru                      |
| Product 6                 | Yellow maca root from Peru                     |
| Product 7                 | Black maca root from Qujing, China             |
| Product 8                 | Yellow maca root powder from Zhaotong, China   |
| Product 9                 | Yellow maca root powder from Qujing, China     |
| Product 10                | Black maca root powder from The Maca Team LLC  |
| Product 11                | Yellow maca root powder from The Maca Team LLC |
| Product 12                | Red maca root powder from The Maca Team LLC    |
| Product 13                | Red maca root extract from The Maca Team LLC   |

**Table S2.** HPLC-MS/MS method Limits of Quantitation

| ID        | LOQ (ng/ml) |
|-----------|-------------|
| <b>2</b>  | 0.4         |
| <b>3</b>  | 0.002       |
| <b>4</b>  | 0.002       |
| <b>5</b>  | 0.002       |
| <b>6</b>  | 0.01        |
| <b>7</b>  | 0.1         |
| <b>8</b>  | 0.002       |
| <b>9</b>  | 1           |
| <b>10</b> | 0.002       |
| <b>11</b> | 0.01        |
| <b>12</b> | 0.01        |
| <b>13</b> | 0.1         |
| <b>14</b> | 0.1         |
| <b>15</b> | 0.1         |

|    |     |
|----|-----|
| 16 | 1   |
| 17 | 0.1 |
| 18 | 0.1 |
| 19 | 0.1 |

**Table S3.** Sum of abundance/IC<sub>50</sub> ratios of individual macamides in *L. meyenii* extracts

| <i>L. meyenii</i> extract | $\Sigma$ Abundance/hsEH IC <sub>50</sub><br>( $\mu\text{g/nM}$ ) | $\Sigma$ Abundance/msEH IC <sub>50</sub><br>( $\mu\text{g/nM}$ ) |
|---------------------------|------------------------------------------------------------------|------------------------------------------------------------------|
| E1                        | 0.100                                                            | 0.339                                                            |
| E2                        | 18.0                                                             | 62.3                                                             |
| E3                        | 6.72                                                             | 22.2                                                             |
| E4                        | 7.75                                                             | 24.8                                                             |
| E5                        | 0.866                                                            | 2.41                                                             |
| E6                        | 0.597                                                            | 1.58                                                             |
| E7                        | 0.282                                                            | 0.978                                                            |
| E8                        | 9.72                                                             | 31.5                                                             |
| E9                        | 14.1                                                             | 46.8                                                             |
| E10                       | 1.28                                                             | 4.04                                                             |
| E11                       | 6.43                                                             | 20.3                                                             |
| E12                       | 3.37                                                             | 11.2                                                             |
| E13                       | 0.050                                                            | 0.179                                                            |

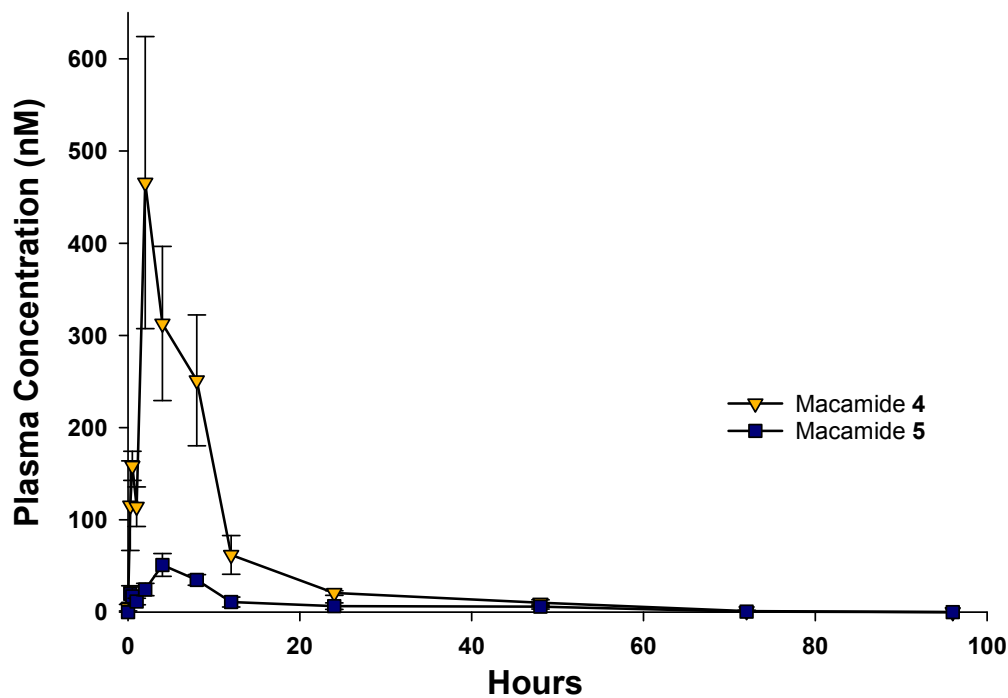

**Figure S1.** Pharmacokinetic study in rat: 96-hr time course for plasma concentrations of macamides 4 and 5

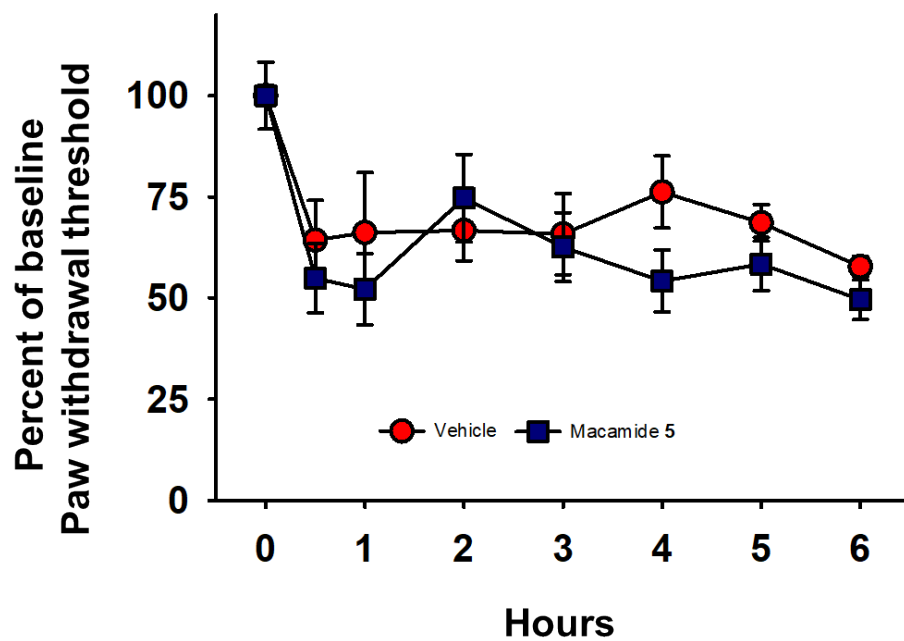

**Figure S2.** Analgesic efficacy of macamide 5 (100 mg/kg) against LPS induced inflammatory pain in rat was not statistically significant compared to the vehicle control. Scores are the mean  $\pm$  SEM reported as percent of baseline (normalized to 100%) calculated as the score  $\times$  100/baseline score (Kruskal-Wallis One Way Analysis of Variance on Ranks,  $\alpha=0.05$ ,  $p=0.407$ ,  $n=4$ /group)

**Table S4.** Experimental and Literature  $IC_{50}$  values of positive control, *t*-TUCB

|              | hsEH $IC_{50}$ (nM) | rsEH $IC_{50}$ (nM) | msEH $IC_{50}$ (nM) |
|--------------|---------------------|---------------------|---------------------|
| Experimental | 0.4                 | 11                  | 2.5                 |
| Literature   | 0.9                 | 16                  | 1.3                 |

**Table S5.** Normalized efficiencies of macamide extraction procedures

| ID | Hexanes: EtOH (7:1)/Ultrasonication (%) | Hexanes/Ultrasonication (%) | Hexanes/Soxhlet (%) |
|----|-----------------------------------------|-----------------------------|---------------------|
| 2  | 100                                     | 90.0                        | 93.1                |
| 3  | 100                                     | 98.7                        | 86.4                |
| 4  | 100                                     | 95.0                        | 62.8                |

|           |     |      |      |
|-----------|-----|------|------|
| <b>5</b>  | 100 | 78.1 | 75.2 |
| <b>8</b>  | 100 | 96.9 | 96.4 |
| <b>9</b>  | 100 | 146  | 87.7 |
| <b>10</b> | 100 | 113  | 97.1 |
| <b>11</b> | 100 | 89.8 | 81.5 |
| <b>12</b> | 100 | 98.9 | 83.9 |

---

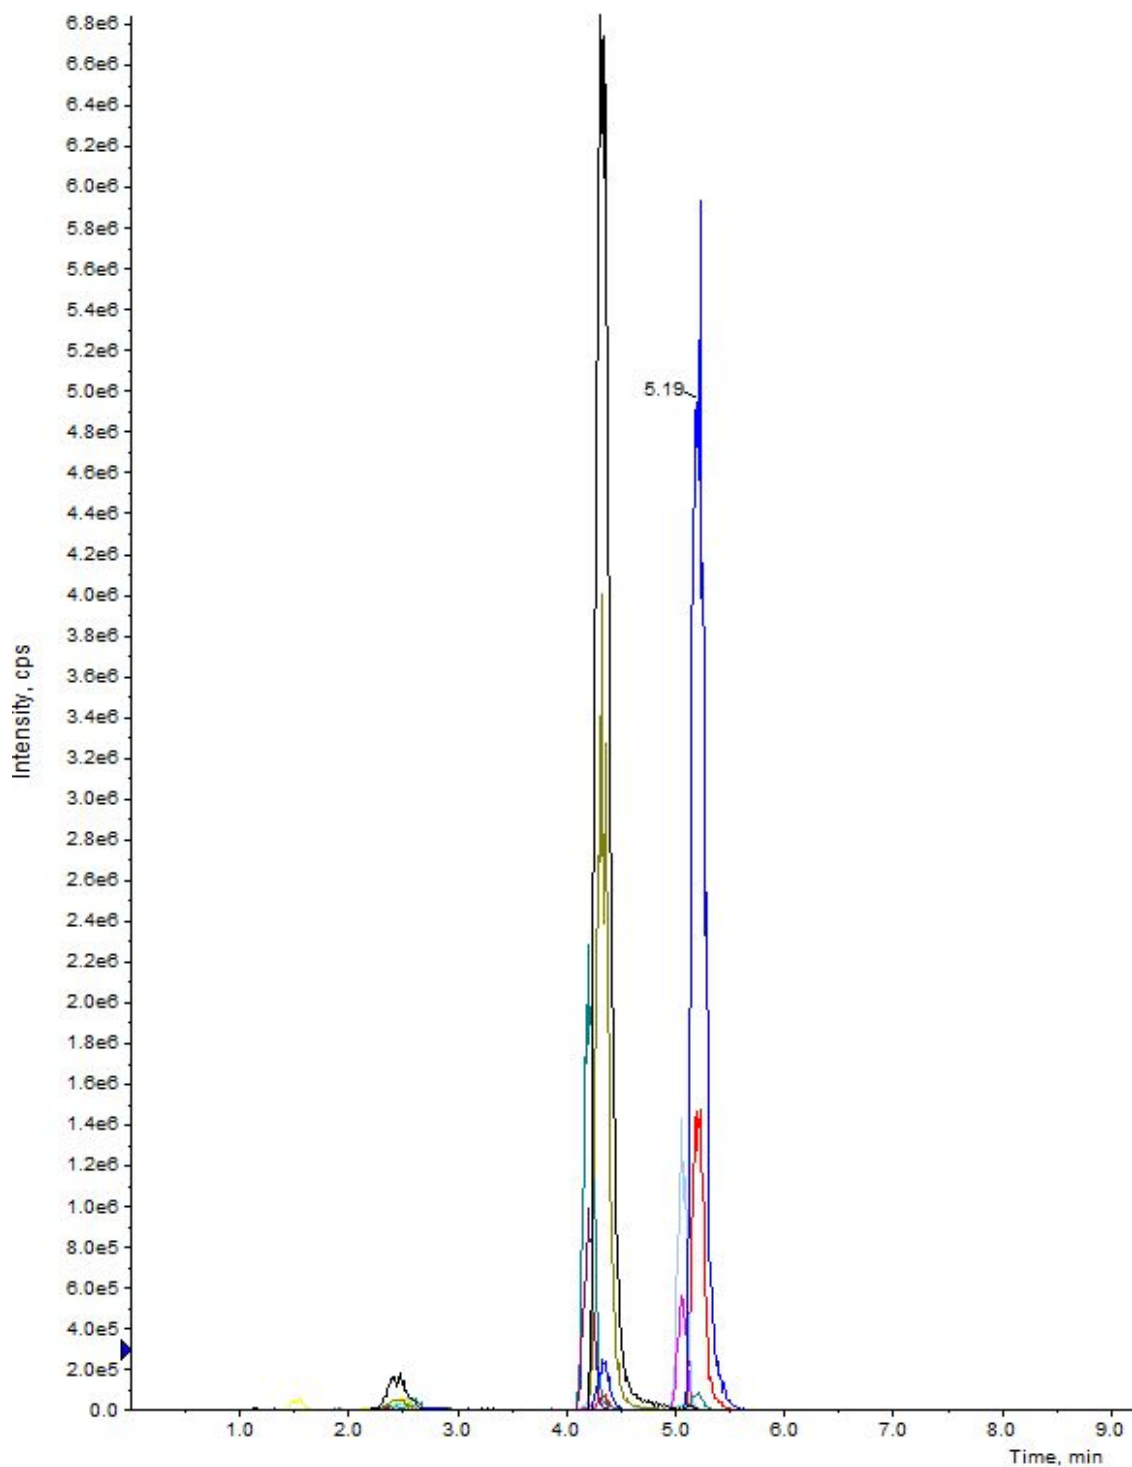

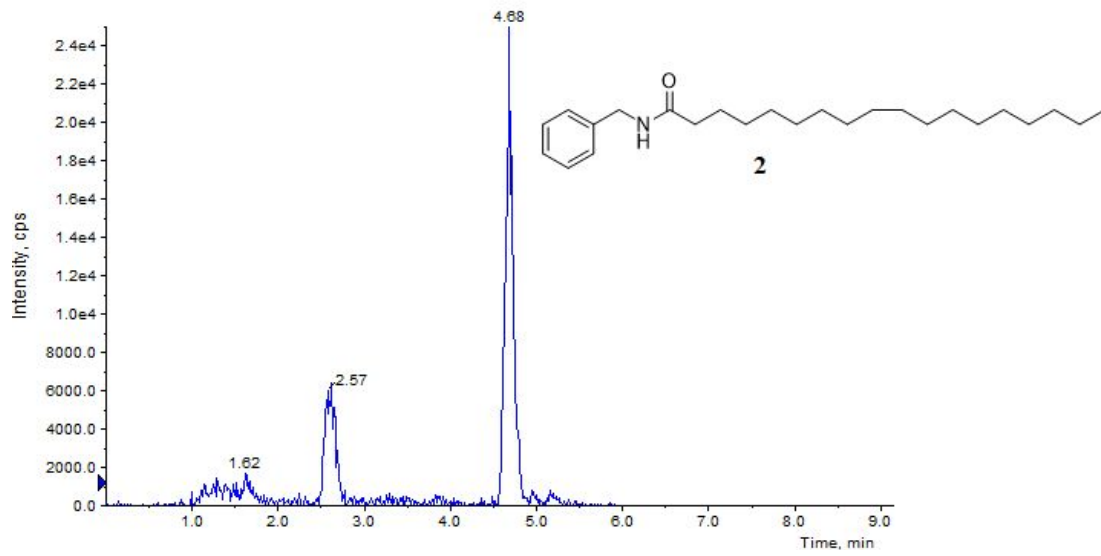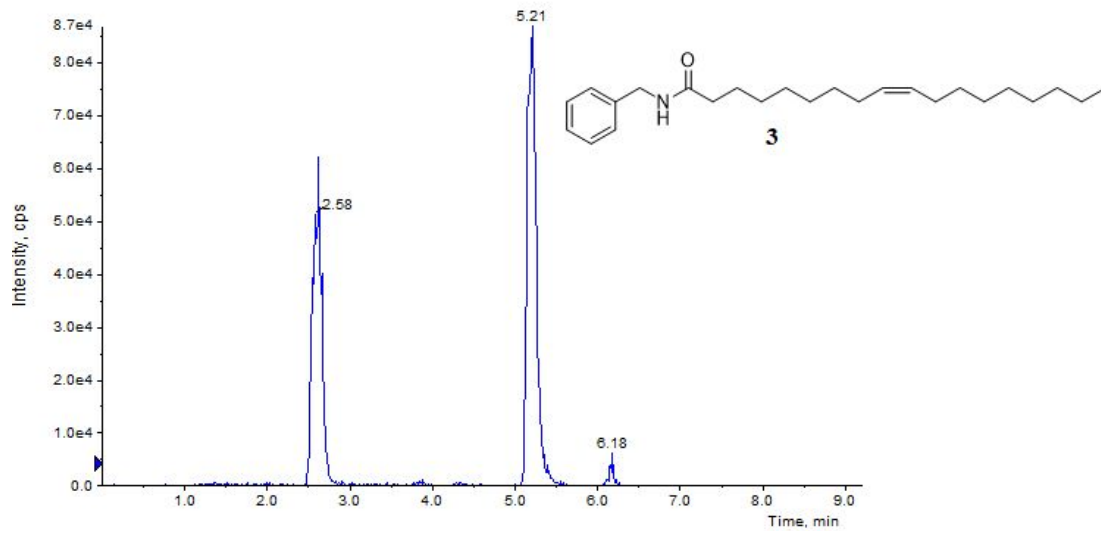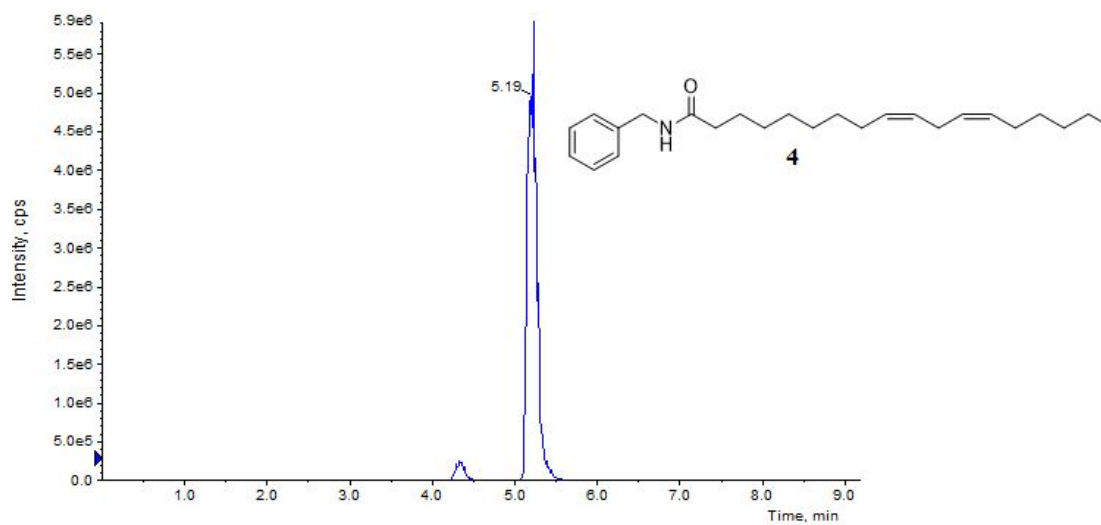

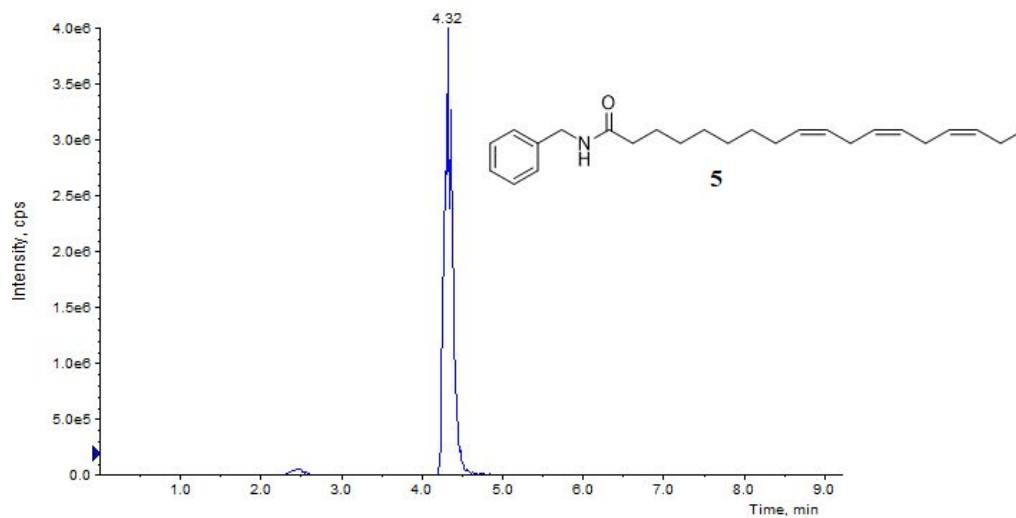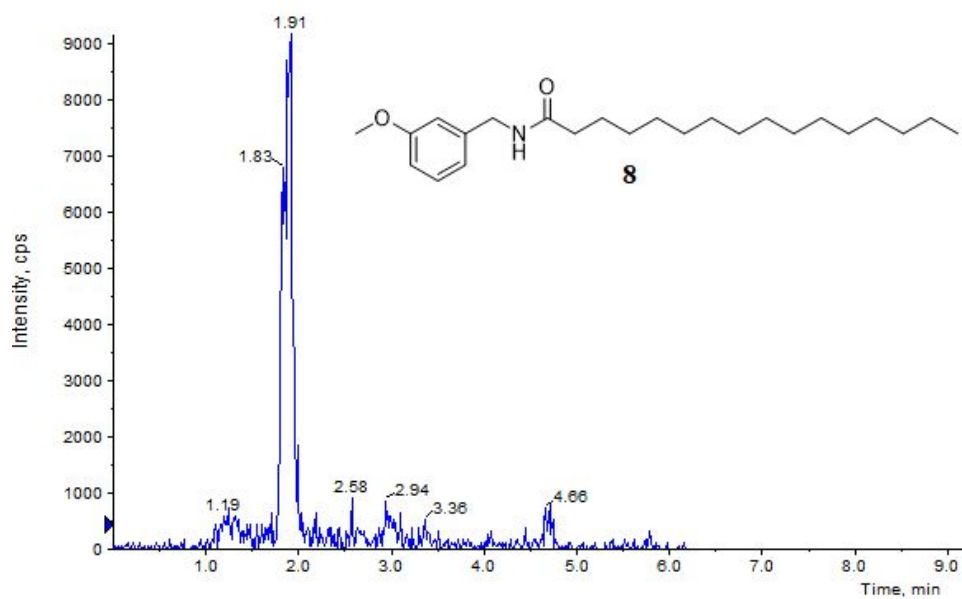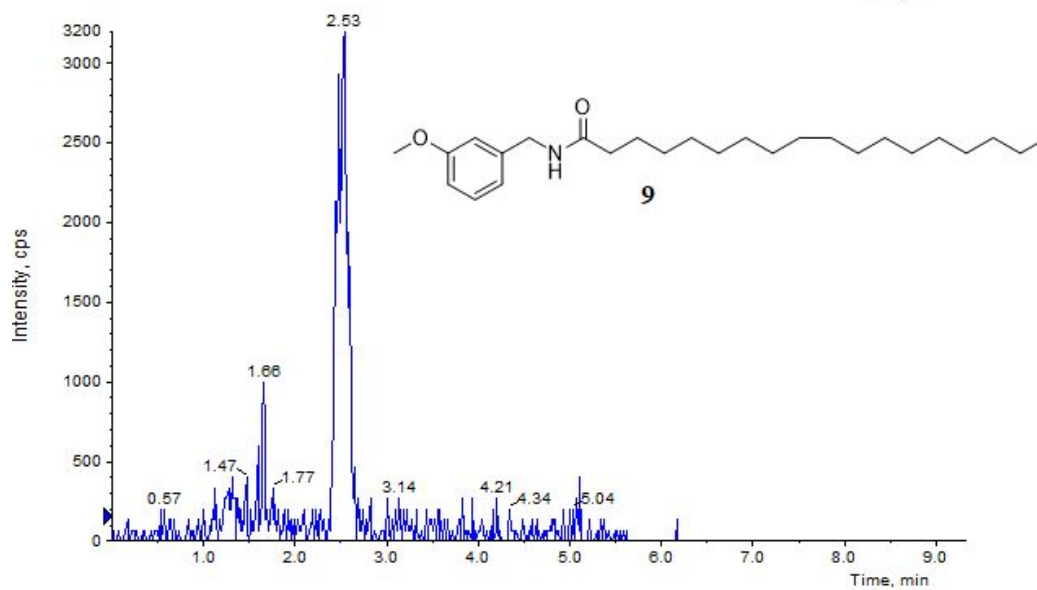



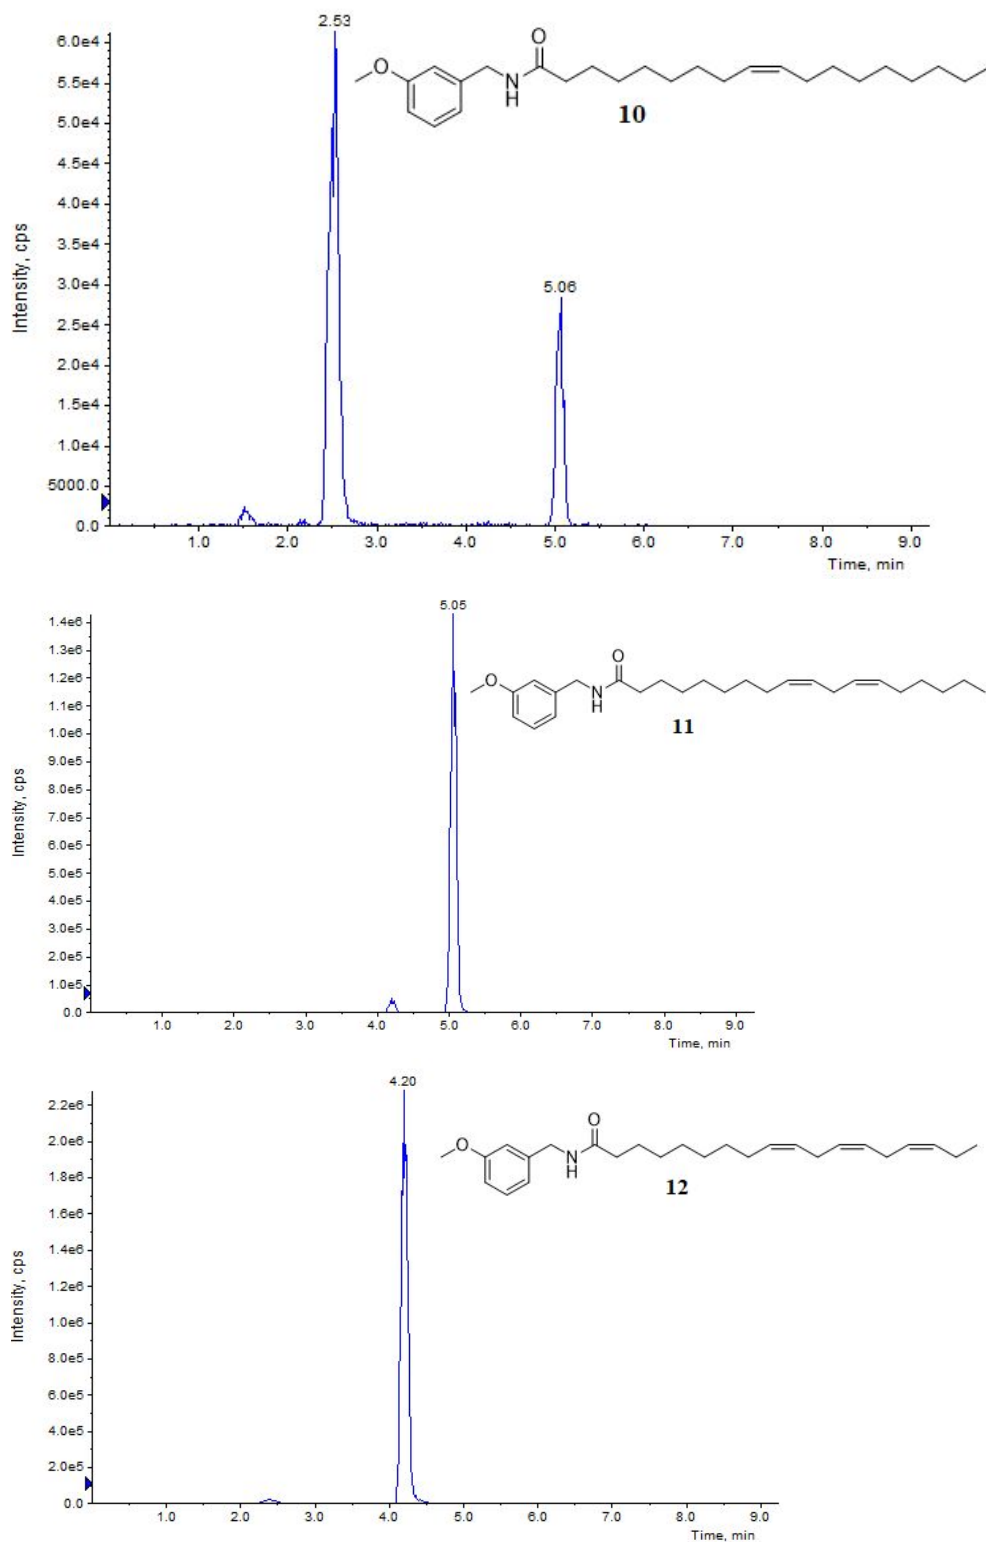

**Figure S3.** HPLC Trace of the extract of commercial *L. meyenii* product 2 and the known natural product macamides detected (2-5, 8-12).

<sup>1</sup>H and <sup>13</sup>C NMR Spectra of new compounds (16, 17 and 19)

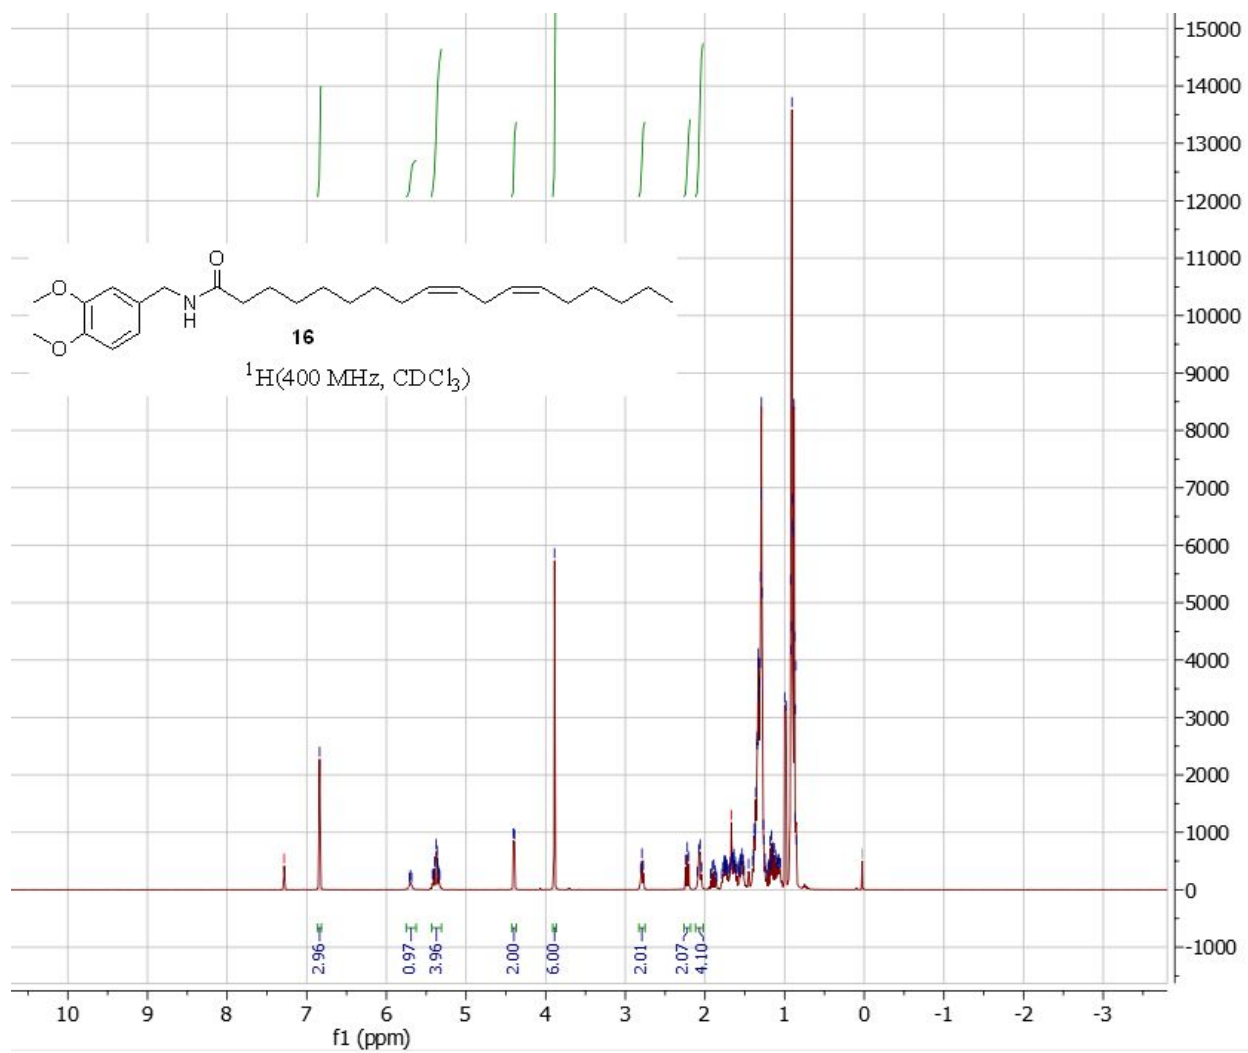

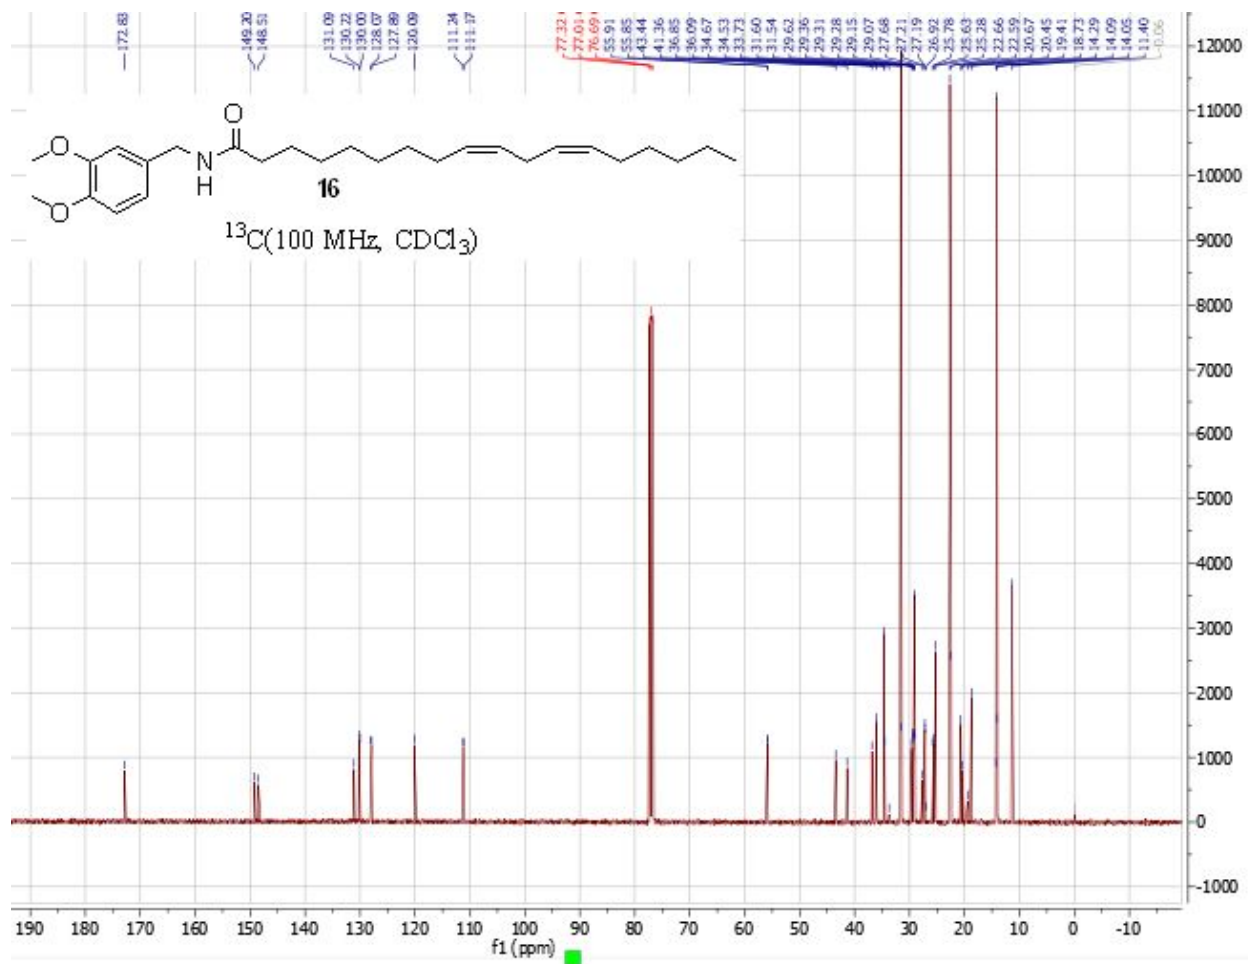

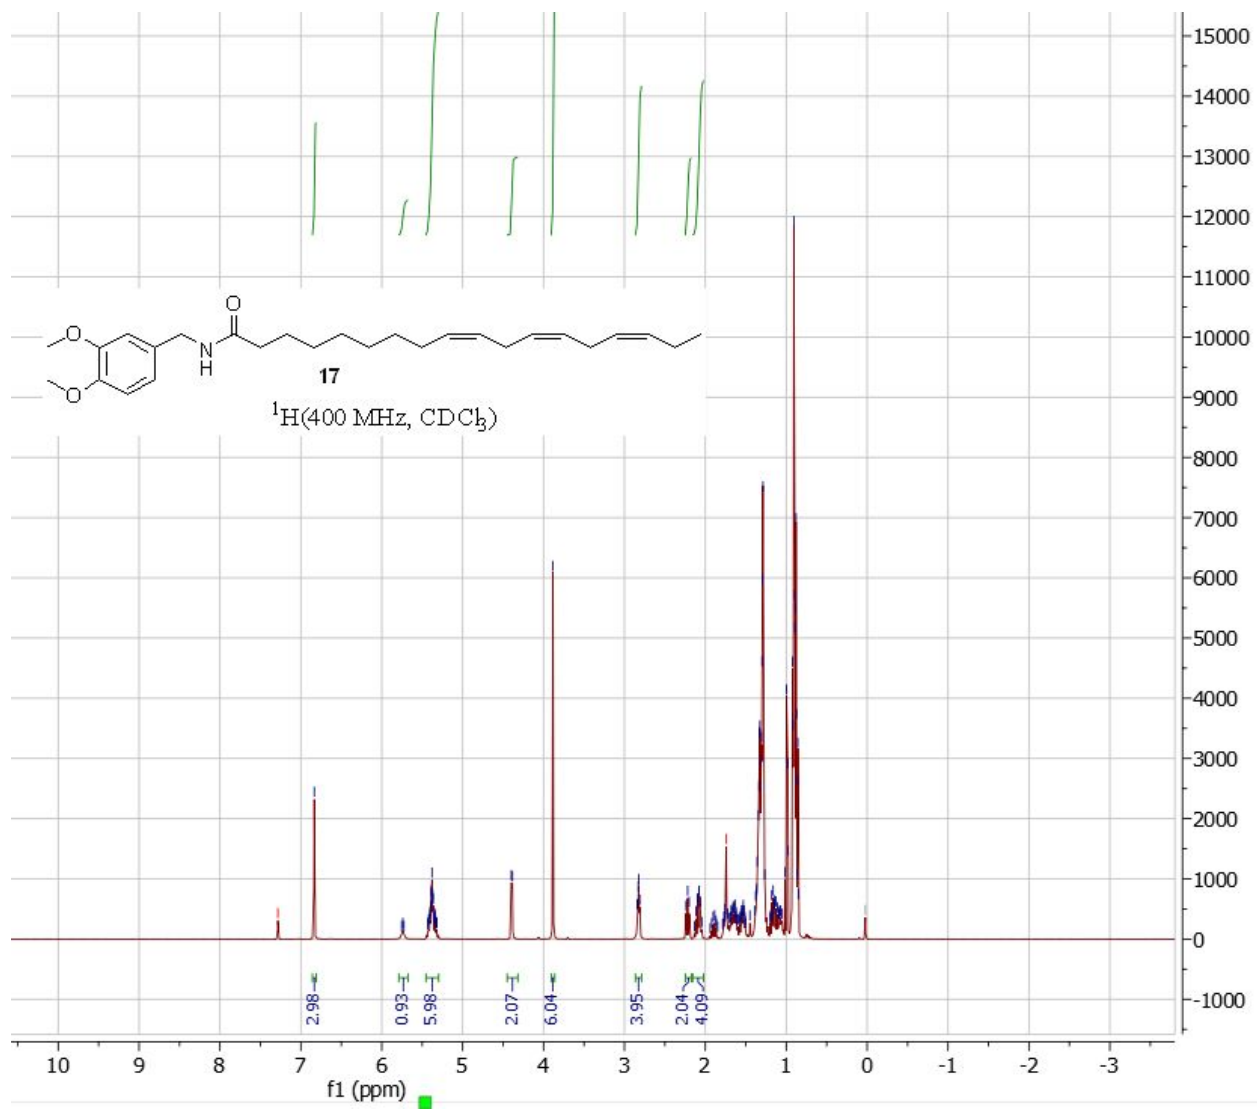

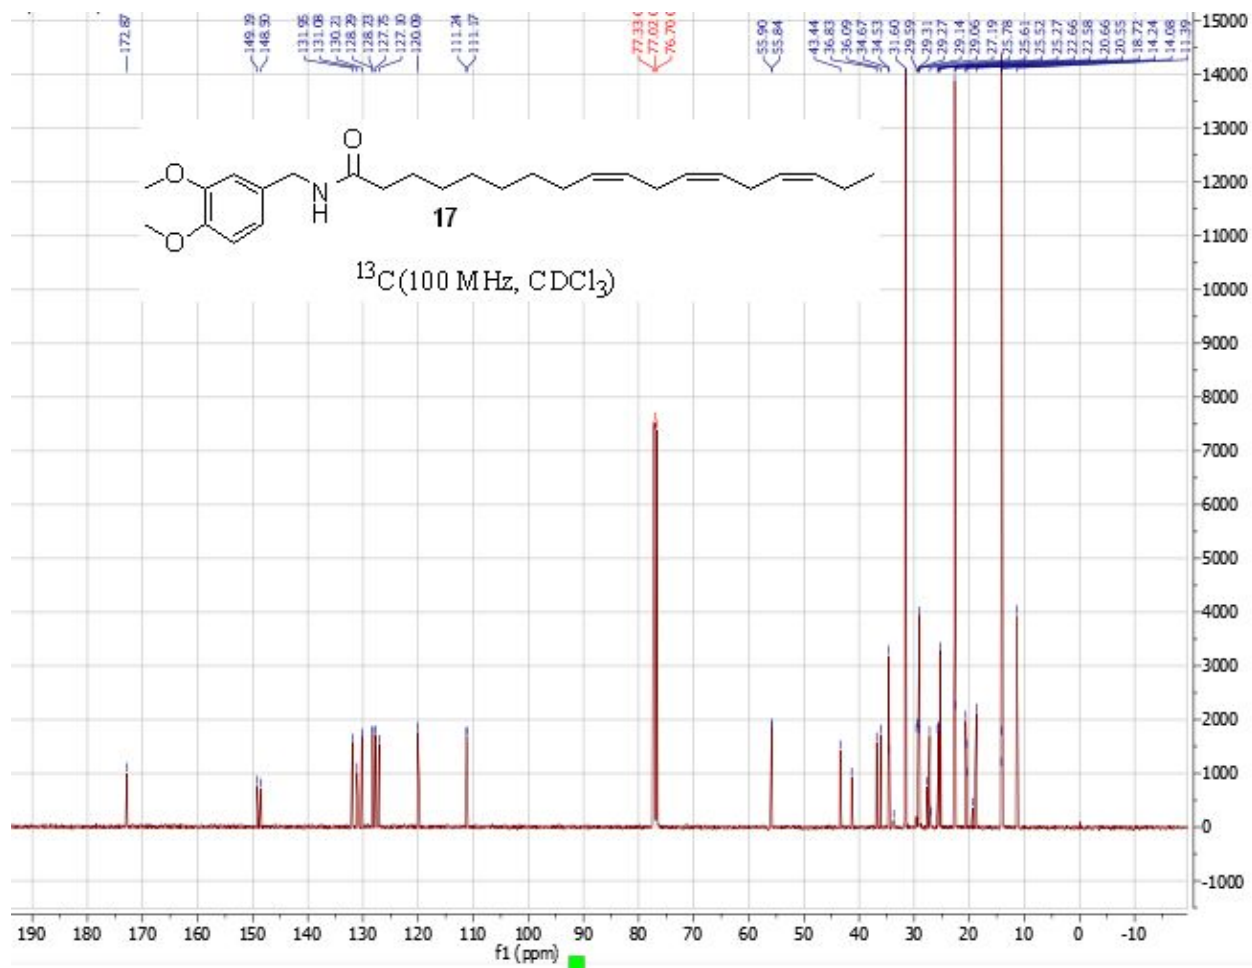

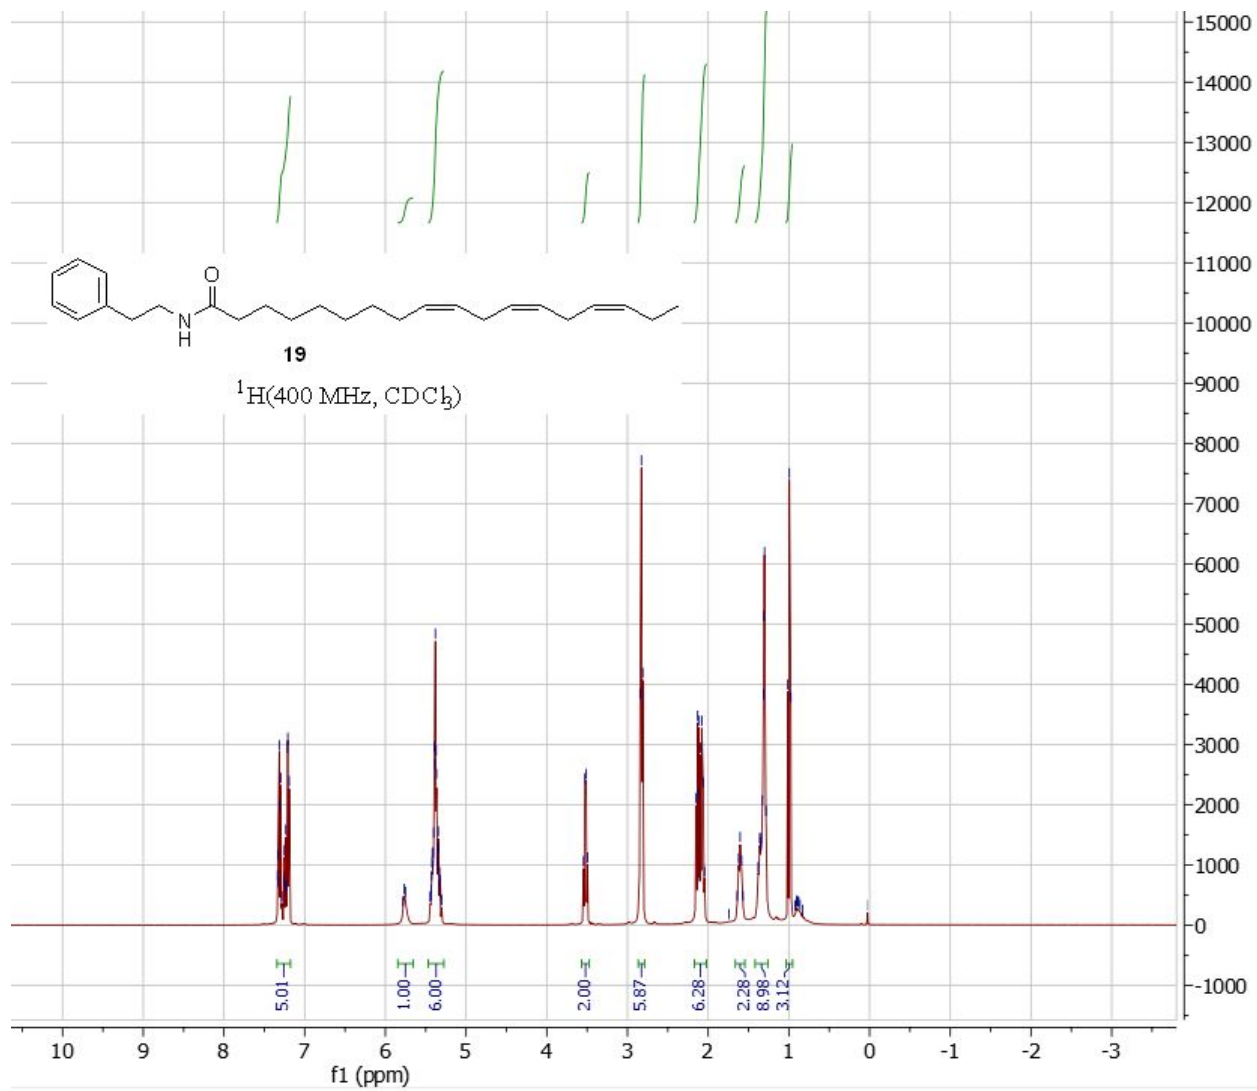

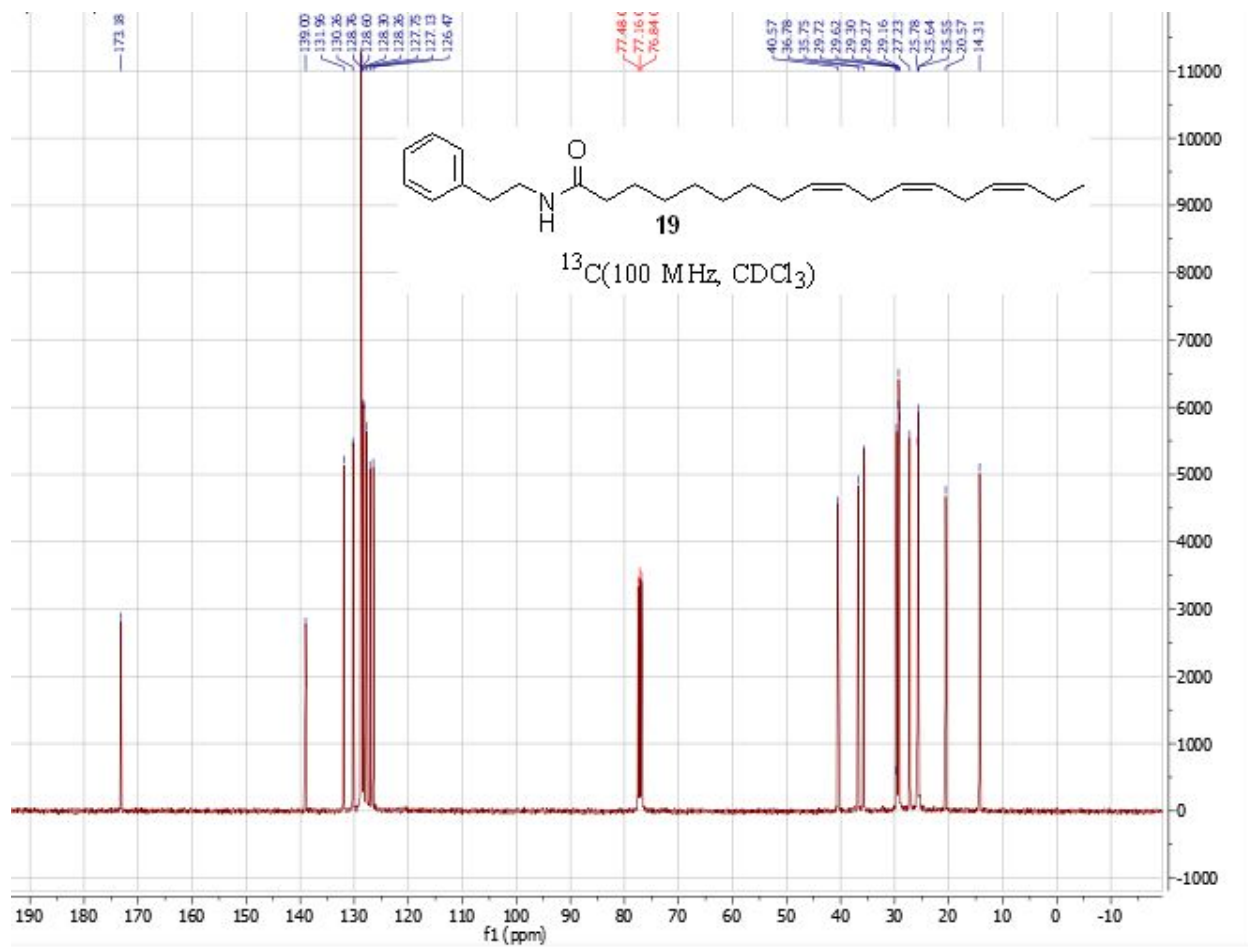

Supplement: NIHMS1671168-supplement-Supplemental_Information.pdf [file NIHMS1671168-supplement-Supplemental_Information.pdf]
